# Supplementary material for: A novel approach to the synthesis of bulk and supported β-Mo2C using dimethyl ether as a carbon source
Source: Royal Society of Chemistry journal article supplement (doi:10.1039/c5nj00395d), 2015-01-01
Supplement: c5nj00395d1.pdf [file c5nj00395d1.pdf]

## Supplementary Information

### New Journal of Chemistry

#### **A novel approach to the synthesis of bulk and supported $\beta$ -Mo<sub>2</sub>C using dimethyl ether as a carbon source**

**Yu Zhao<sup>a</sup>, Zhiwei Yao<sup>\*a</sup>, Yan Shi<sup>a</sup>, Xue Qiao<sup>a</sup>, Guanzhang Wang<sup>a</sup>, Haiyan Wang<sup>a</sup>,  
Jingzhou Yin<sup>b</sup> and Feng Peng<sup>\*c</sup>**

<sup>a</sup>*College of Chemistry, Chemical Engineering and Environmental Engineering, Liaoning Shihua  
University, Liaoning, PR China 113001*

<sup>b</sup>*Jiangsu Key Laboratory for Chemistry of Low-Dimensional Materials, School of Chemistry and  
Engineering, Huaiyin Normal University, Huaiian, PR China 223300*

<sup>c</sup>*School of Chemistry and Chemical Engineering, South China  
University of Technology, Guangzhou, PR China 510640.*

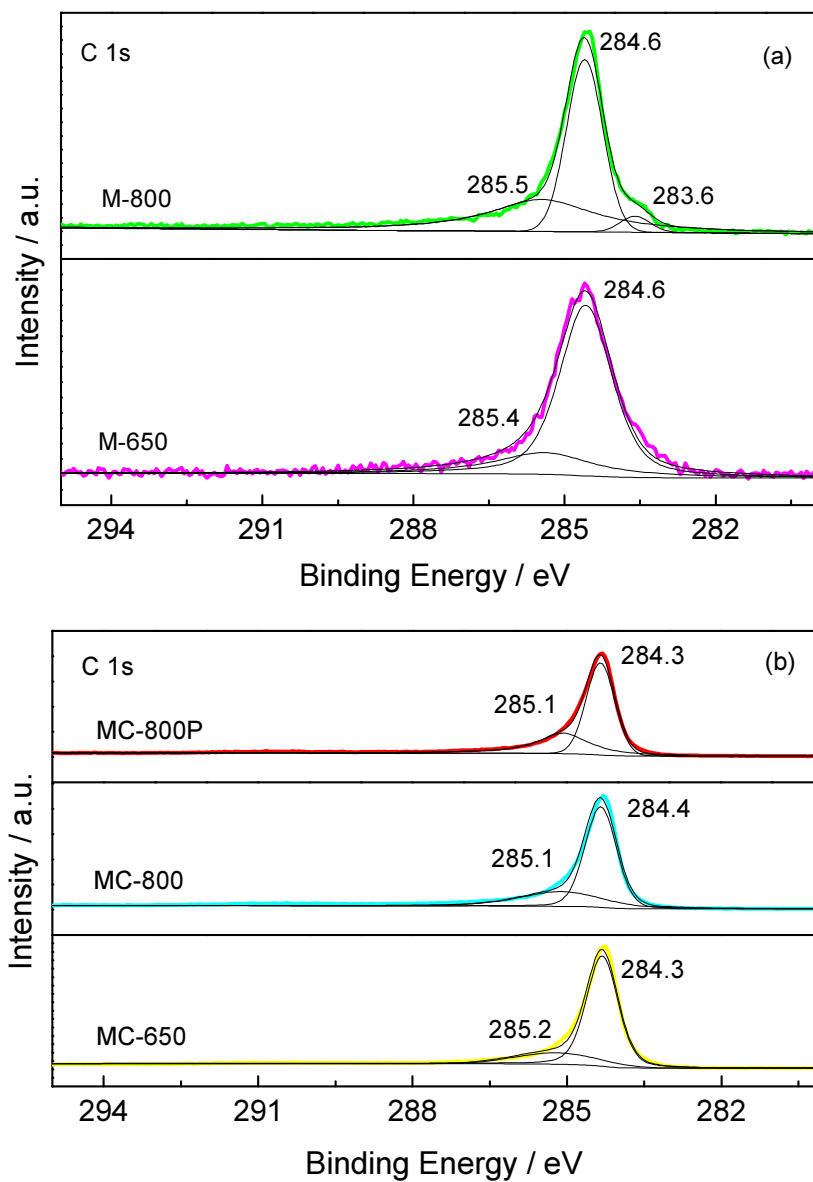

Fig. S1 XPS C 1s spectra of (a) bulk and (b) CNTs supported Mo carbides prepared with DME.
